# Supplementary material for: Modulation Effect on Tubulin Polymerization, Cytotoxicity and Antioxidant Activity of 1H-Benzimidazole-2-Yl Hydrazones
Source: MDPI journal article supplement (doi:10.3390/molecules28010291), 2022-12-29
Supplement: s1 [file s1]

# Modulation effect on tubulin polymerization, cytotoxicity and antioxidant activity of 1H-benzimidazole-2-yl hydrazones

Maria Argirova<sup>1</sup>, Maya Guncheva<sup>1</sup>, Georgi Momekov<sup>2</sup>, Emiliya Cherneva<sup>1,2</sup>, Rositsa Mihaylova<sup>2</sup>, Miroslav Rangelov<sup>1</sup>, Nadezhda Todorova<sup>3</sup>, Petko Denev<sup>1</sup>, Kameliya Anichina<sup>4</sup>, Anelia Mavrova<sup>4</sup>, Denitsa Yancheva<sup>2,\*</sup>

<sup>1</sup> Institute of Organic Chemistry with Centre of Phytochemistry, Bulgarian Academy of Sciences, Acad. G. Bonchev str. Bl. 9, 1113 Sofia, Bulgaria

<sup>2</sup> Faculty of Pharmacy, Medical University of Sofia, 2 Dunav str., 1000, Sofia, Bulgaria

<sup>3</sup> Institute of Biodiversity and Ecosystem Research, Bulgarian Academy of Sciences, 2 Gagarin Str., 1113 Sofia, Bulgaria

<sup>4</sup> University of Chemical Technology and Metallurgy, 8 Kliment Ohridski Blvd., 1756 Sofia, Bulgaria

\* Denitsa.Pantaleeva@orgchm.bas.bg, deni@orgchm.bas.bg (D.Y.);

## Contents:

|                                                                                                                                                    |       |
|----------------------------------------------------------------------------------------------------------------------------------------------------|-------|
| <b>Table S1.</b> Toxicological properties of 1H-benzimidazol-2-yl hydrazones <b>1a-l</b> predicted by OSIRIS Property Explorer                     | 2     |
| <b>Figures S1-S12.</b> BOILED-Egg model and bioavailability radar of compounds <b>1a-l</b> predicted by SwissADME program                          | 3-14  |
| <b>Tables S2-S13.</b> Physico-chemical properties and drug-likeness of 1H-benzimidazole-2-yl hydrazones <b>1a-l</b> predicted by SwissADME program | 15-29 |

**Table S1.** Toxicological properties of 1*H*-benzimidazol-2-yl hydrazones **1a-l** predicted by OSIRIS Property Explorer

| <b>Compd</b> |                                                               | <b>Mutagenic<br/>risk</b> | <b>Tumorigenic<br/>risk</b> | <b>Irritant<br/>risk</b> | <b>Reproductivity<br/>risk</b> |
|--------------|---------------------------------------------------------------|---------------------------|-----------------------------|--------------------------|--------------------------------|
| <b>1a</b>    | R <sub>1</sub> =H; R <sub>2</sub> = 2-OH                      | low                       | low                         | low                      | low                            |
| <b>1b</b>    | R <sub>1</sub> =H; R <sub>2</sub> = 2,3-diOH                  | high                      | low                         | low                      | low                            |
| <b>1c</b>    | R <sub>1</sub> =H; R <sub>2</sub> = 2,4-diOH                  | low                       | low                         | low                      | low                            |
| <b>1d</b>    | R <sub>1</sub> =H; R <sub>2</sub> = 3,4-diOH                  | low                       | low                         | low                      | low                            |
| <b>1e</b>    | R <sub>1</sub> =H; R <sub>2</sub> = 2,3,4-triOH               | low                       | low                         | low                      | low                            |
| <b>1f</b>    | R <sub>1</sub> =H; R <sub>2</sub> = 4-OCH <sub>3</sub>        | low                       | low                         | low                      | low                            |
| <b>1g</b>    | R <sub>1</sub> =H; R <sub>2</sub> = 2,6-diOCH <sub>3</sub>    | low                       | low                         | low                      | low                            |
| <b>1h</b>    | R <sub>1</sub> =H; R <sub>2</sub> = 3,5-diOCH <sub>3</sub>    | low                       | low                         | low                      | low                            |
| <b>1i</b>    | R <sub>1</sub> =H; R <sub>2</sub> = 3,4,5-triOCH <sub>3</sub> | low                       | low                         | low                      | low                            |
| <b>1j</b>    | R <sub>1</sub> =H; R <sub>2</sub> =2-OH-3-OCH <sub>3</sub>    | high                      | low                         | medium                   | low                            |
| <b>1k</b>    | R <sub>1</sub> =H; R <sub>2</sub> =2-OH-4-OCH <sub>3</sub>    | low                       | low                         | low                      | high                           |
| <b>1l</b>    | R <sub>1</sub> =H; R <sub>2</sub> =3-OH-4-OCH <sub>3</sub>    | low                       | low                         | low                      | low                            |

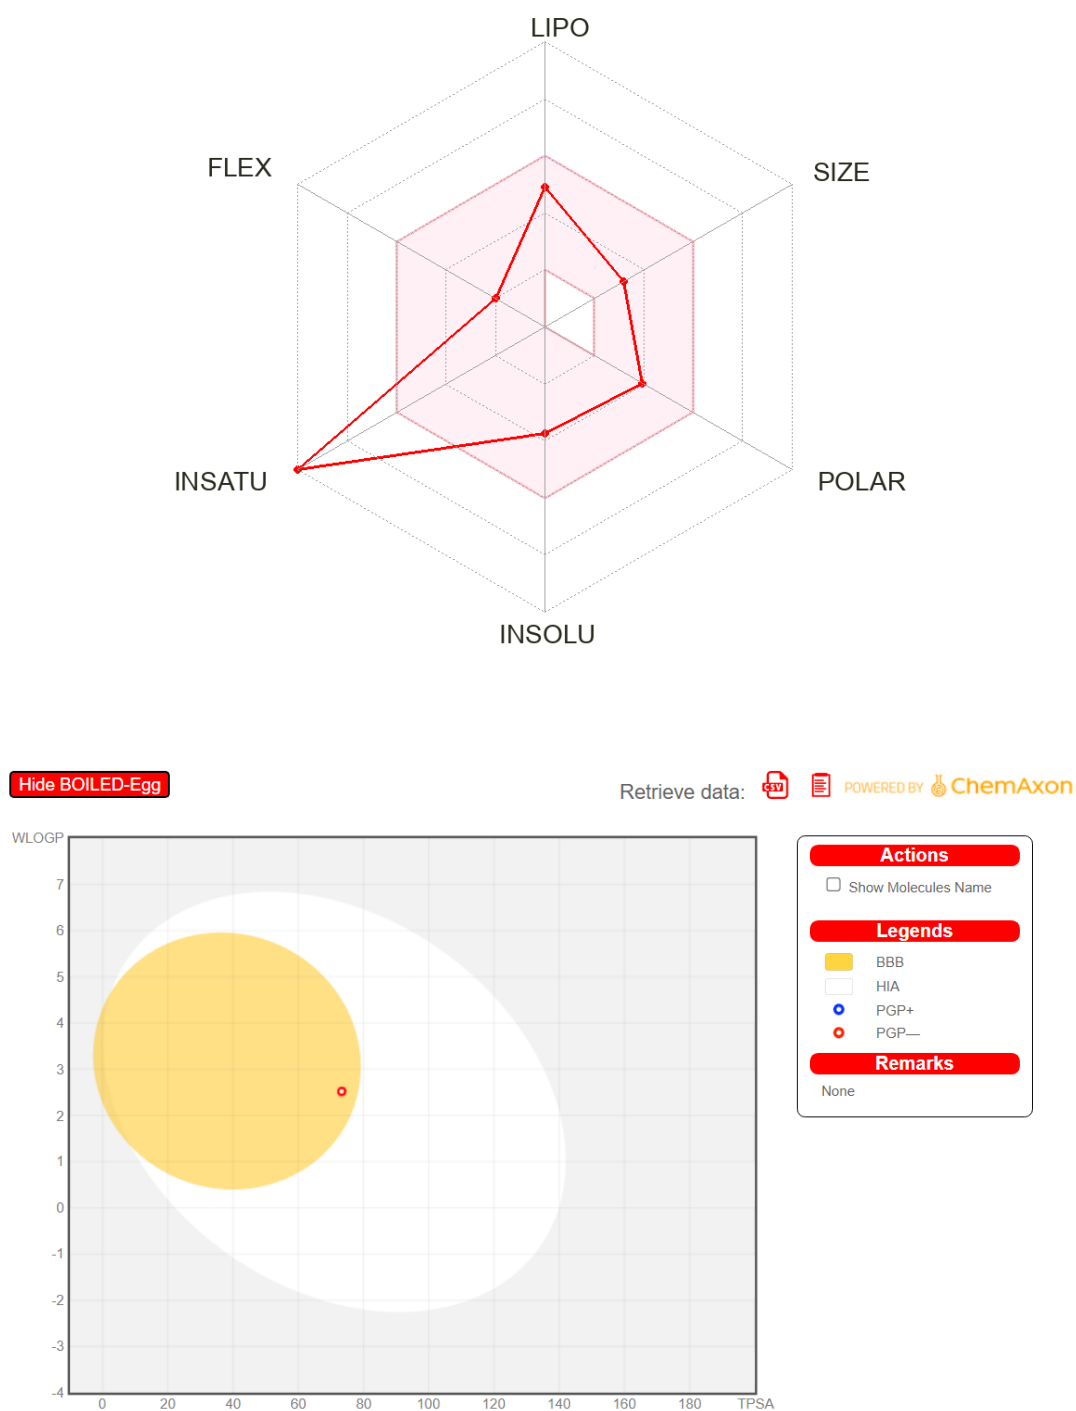

**Figurw S1.** Bioavailability radar and BOILED-Egg model of compound **1a** predicted by SwissADME program

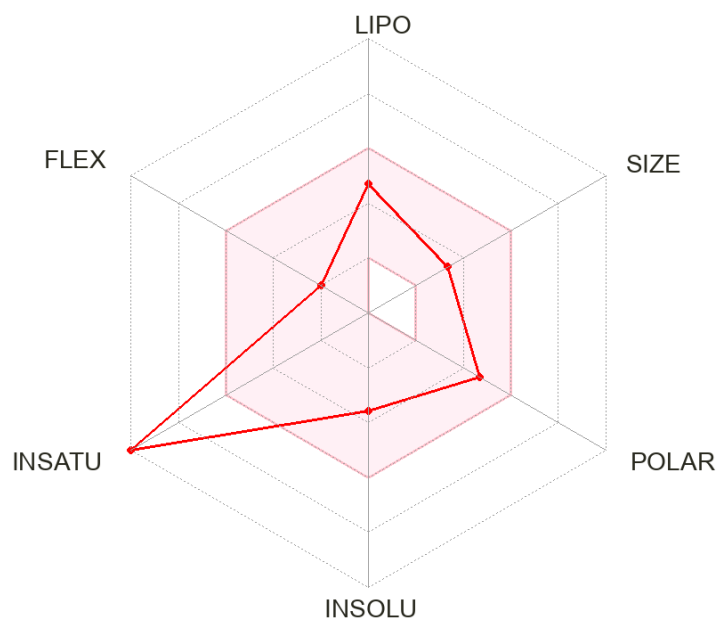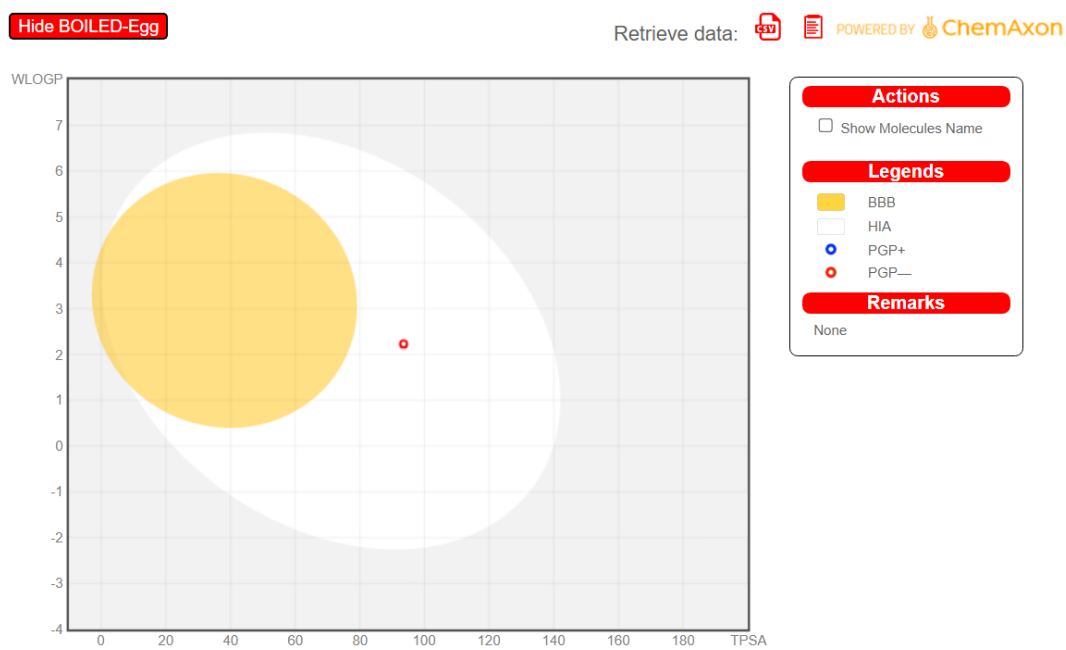

**Figurw S2.** Bioavailability radar and BOILED-Egg model of compound **1b** predicted by SwissADME program

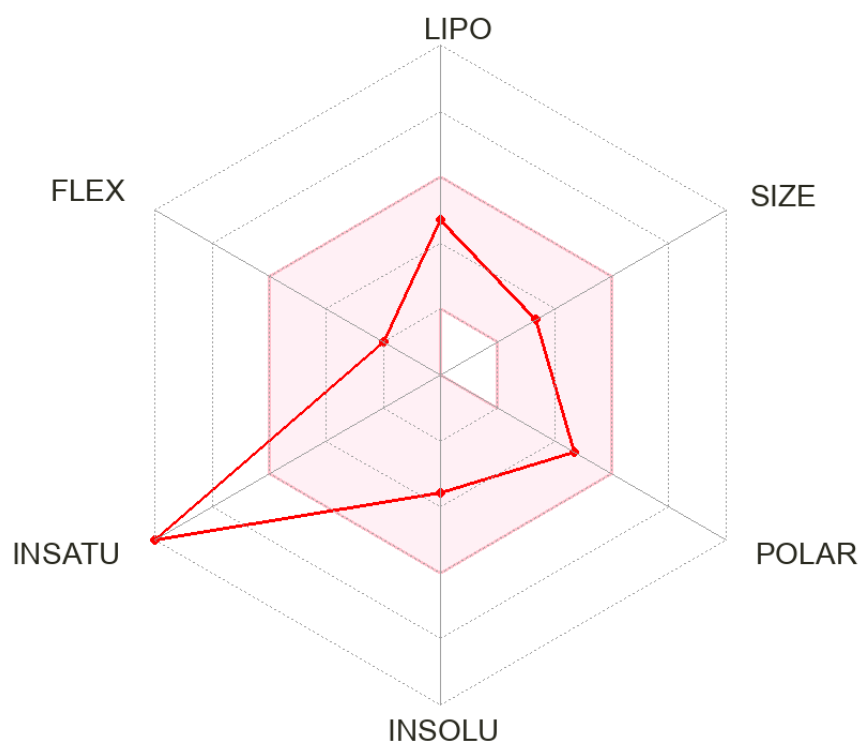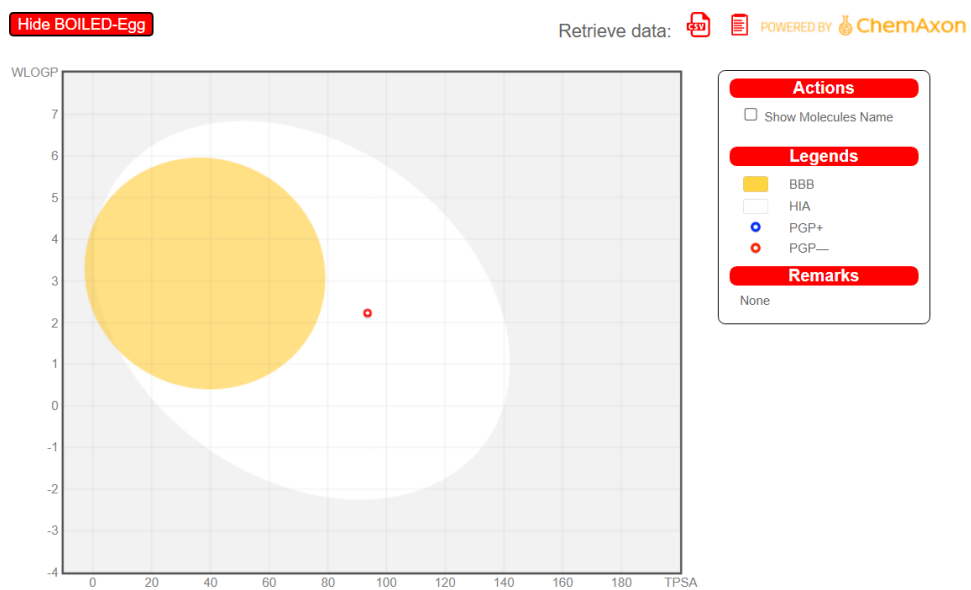

**Figurw S3.** Bioavailability radar and BOILED-Egg model of compound **1c** predicted by SwissADME program

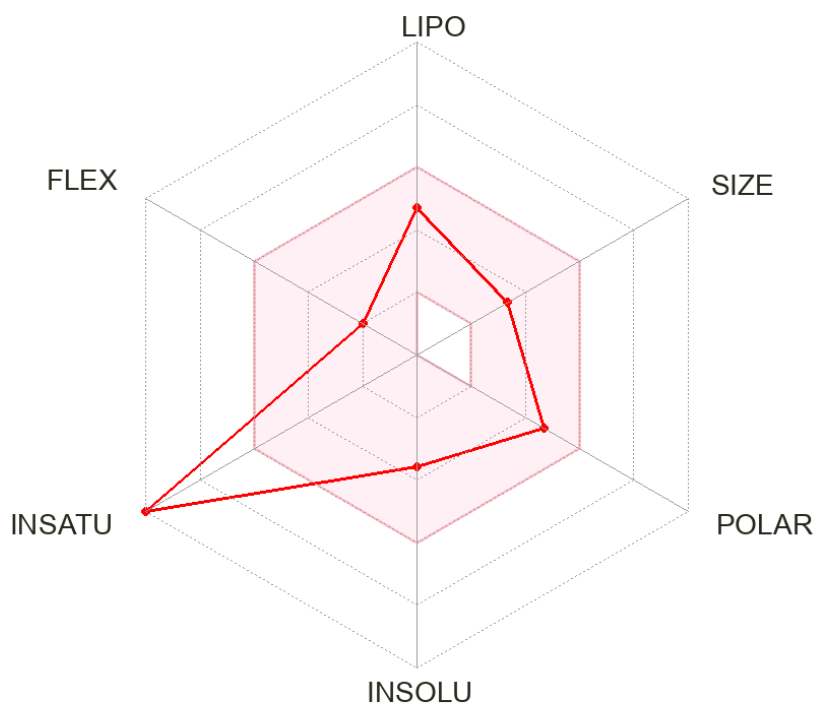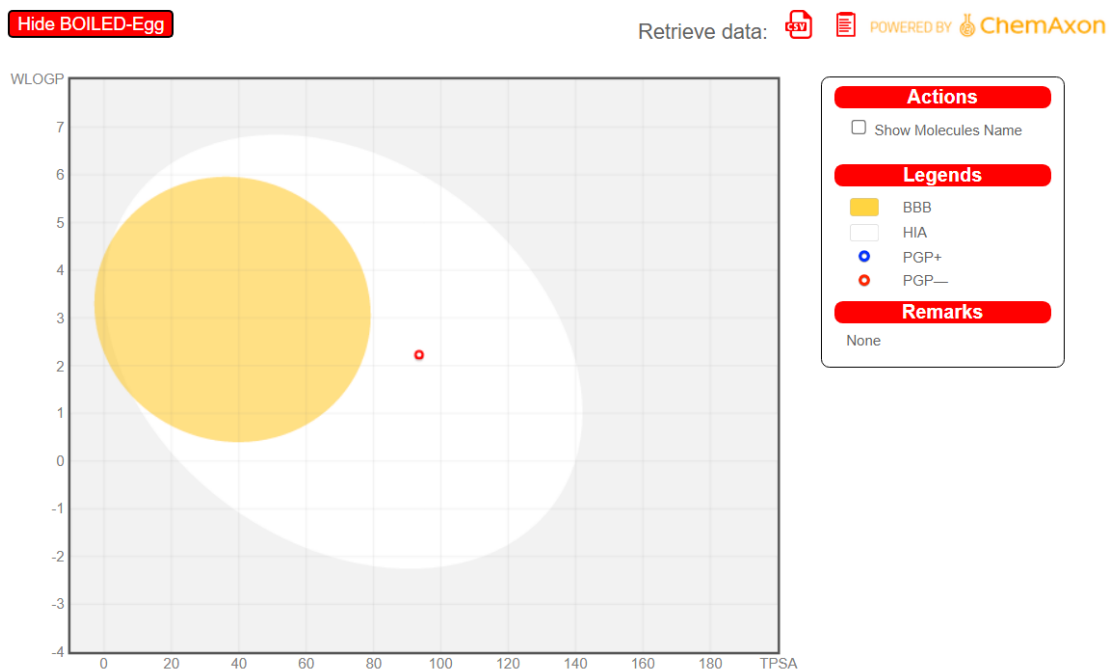

**Figurw S4.** Bioavailability radar and BOILED-Egg model of compound **1d** predicted by SwissADME program

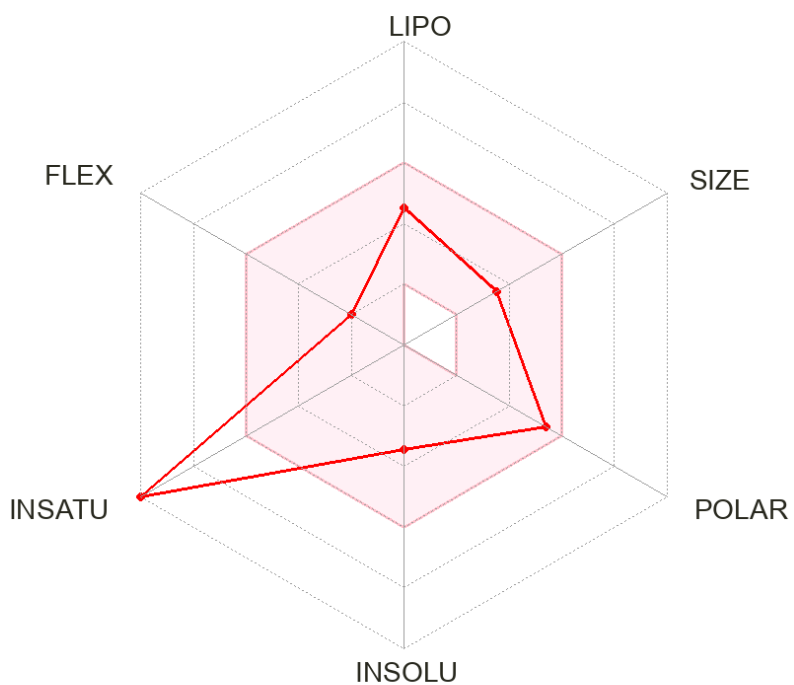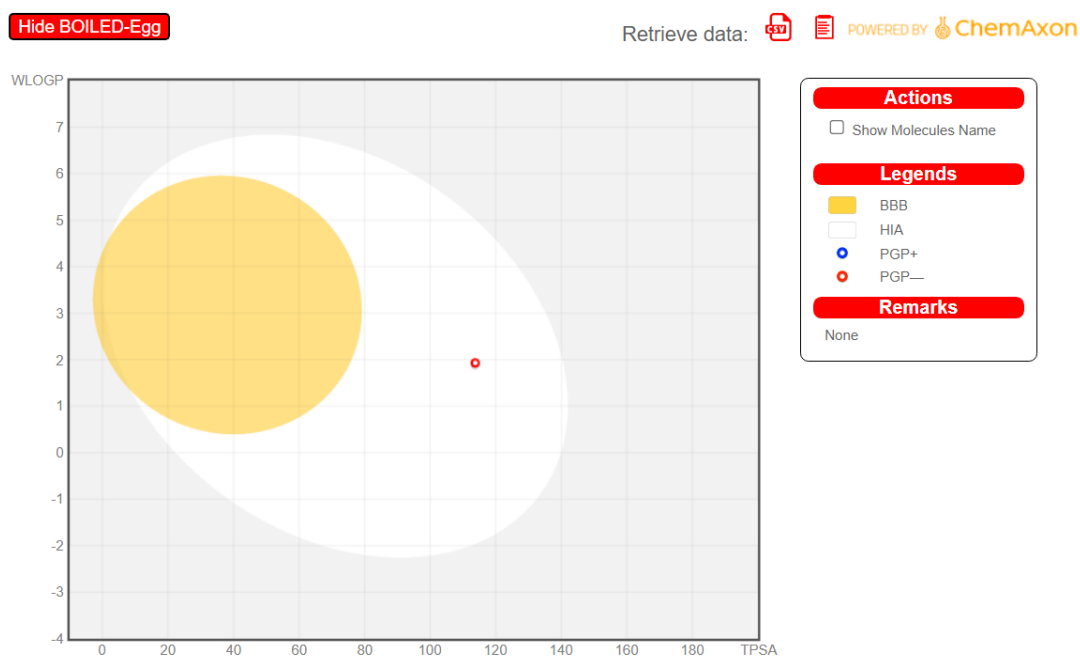

**Figurw S5.** Bioavailability radar and BOILED-Egg model of compound **1e** predicted by SwissADME program

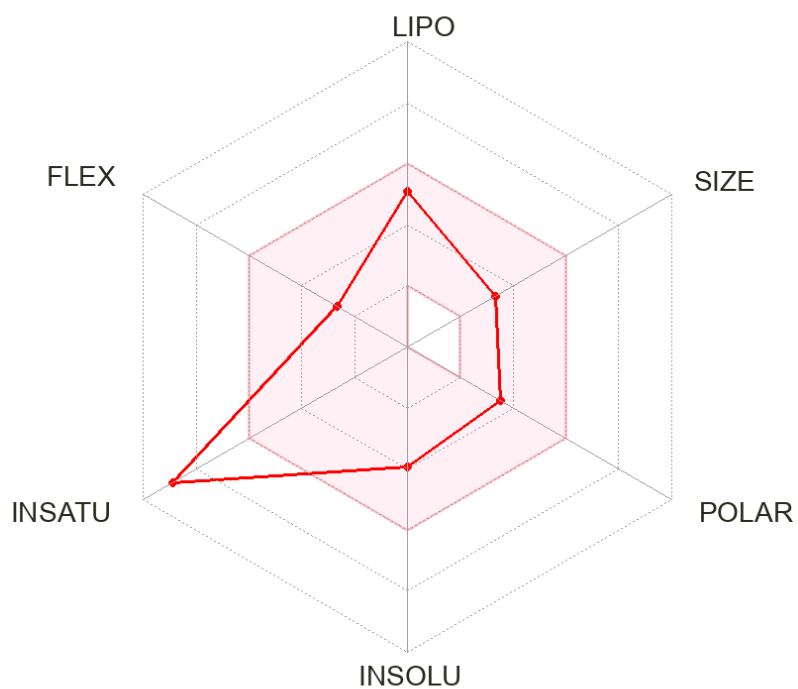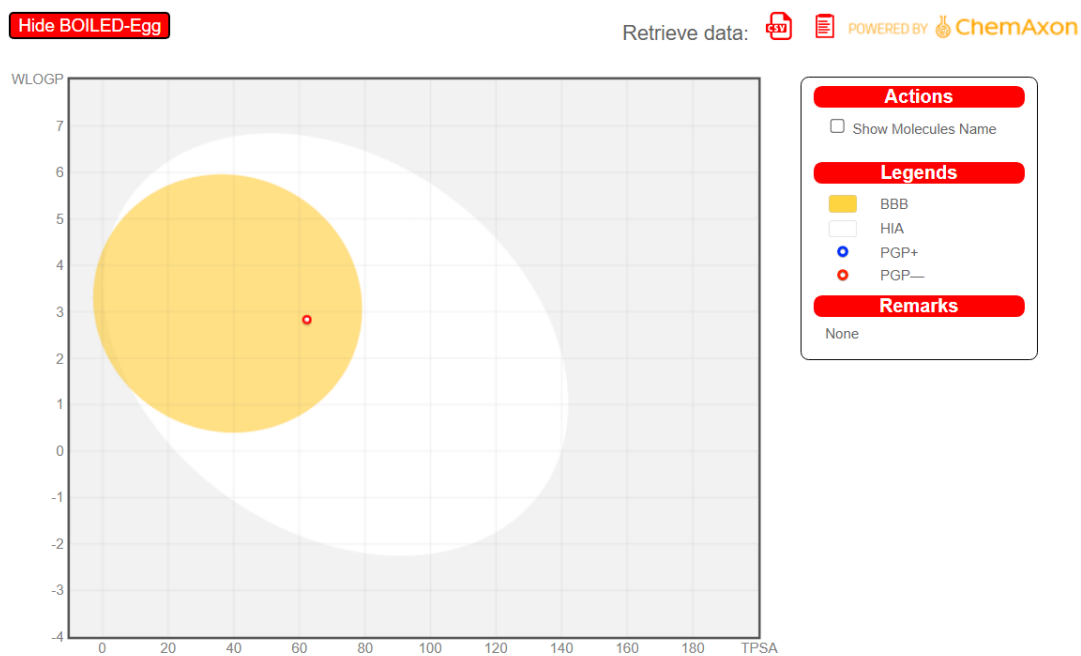

**Figurw S6.** Bioavailability radar and BOILED-Egg model of compound **1f** predicted by SwissADME program



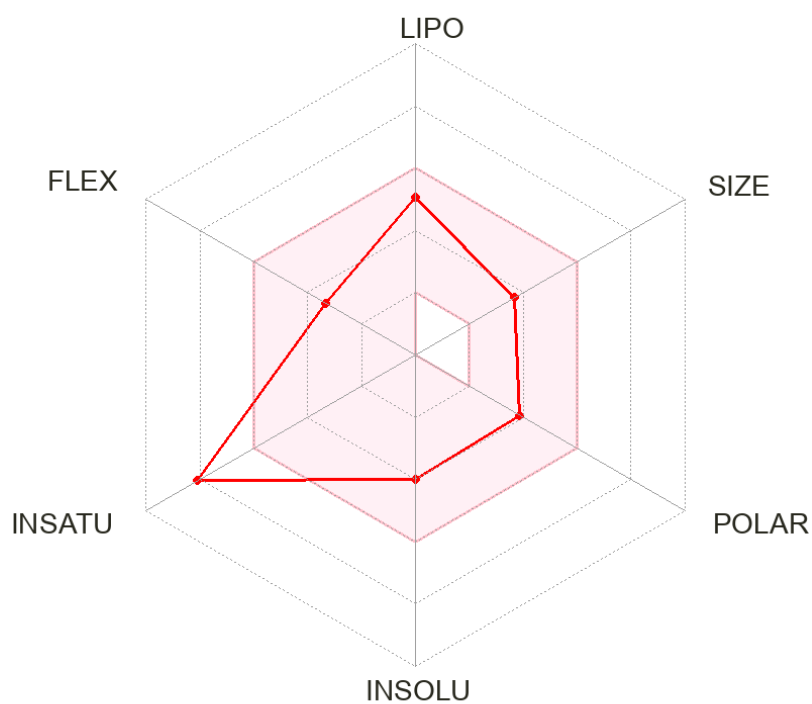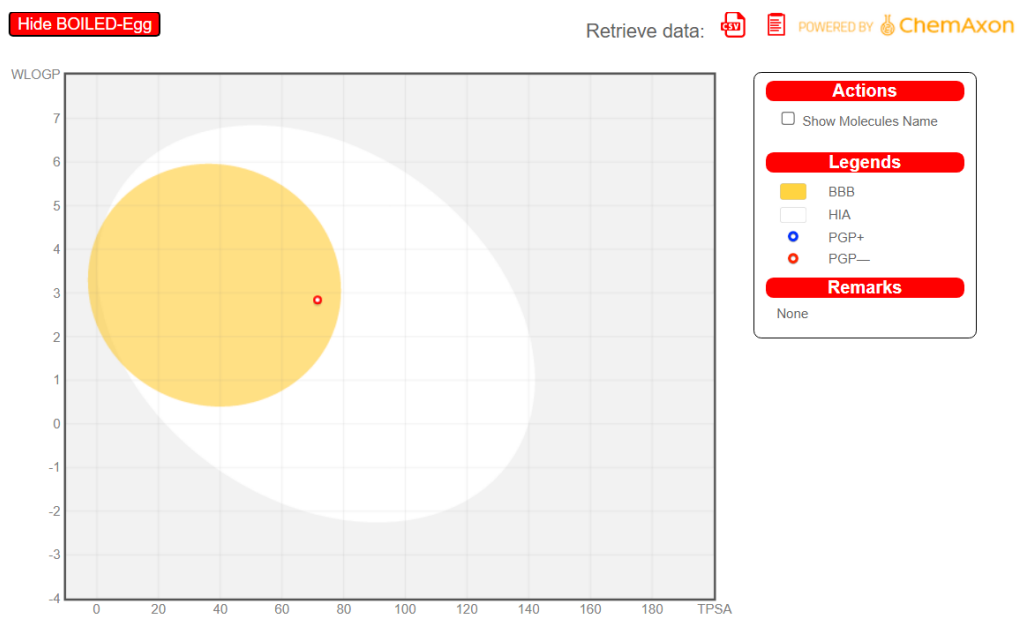

**Figurw S7.** Bioavailability radar and BOILED-Egg model of compound **1g** predicted by SwissADME program

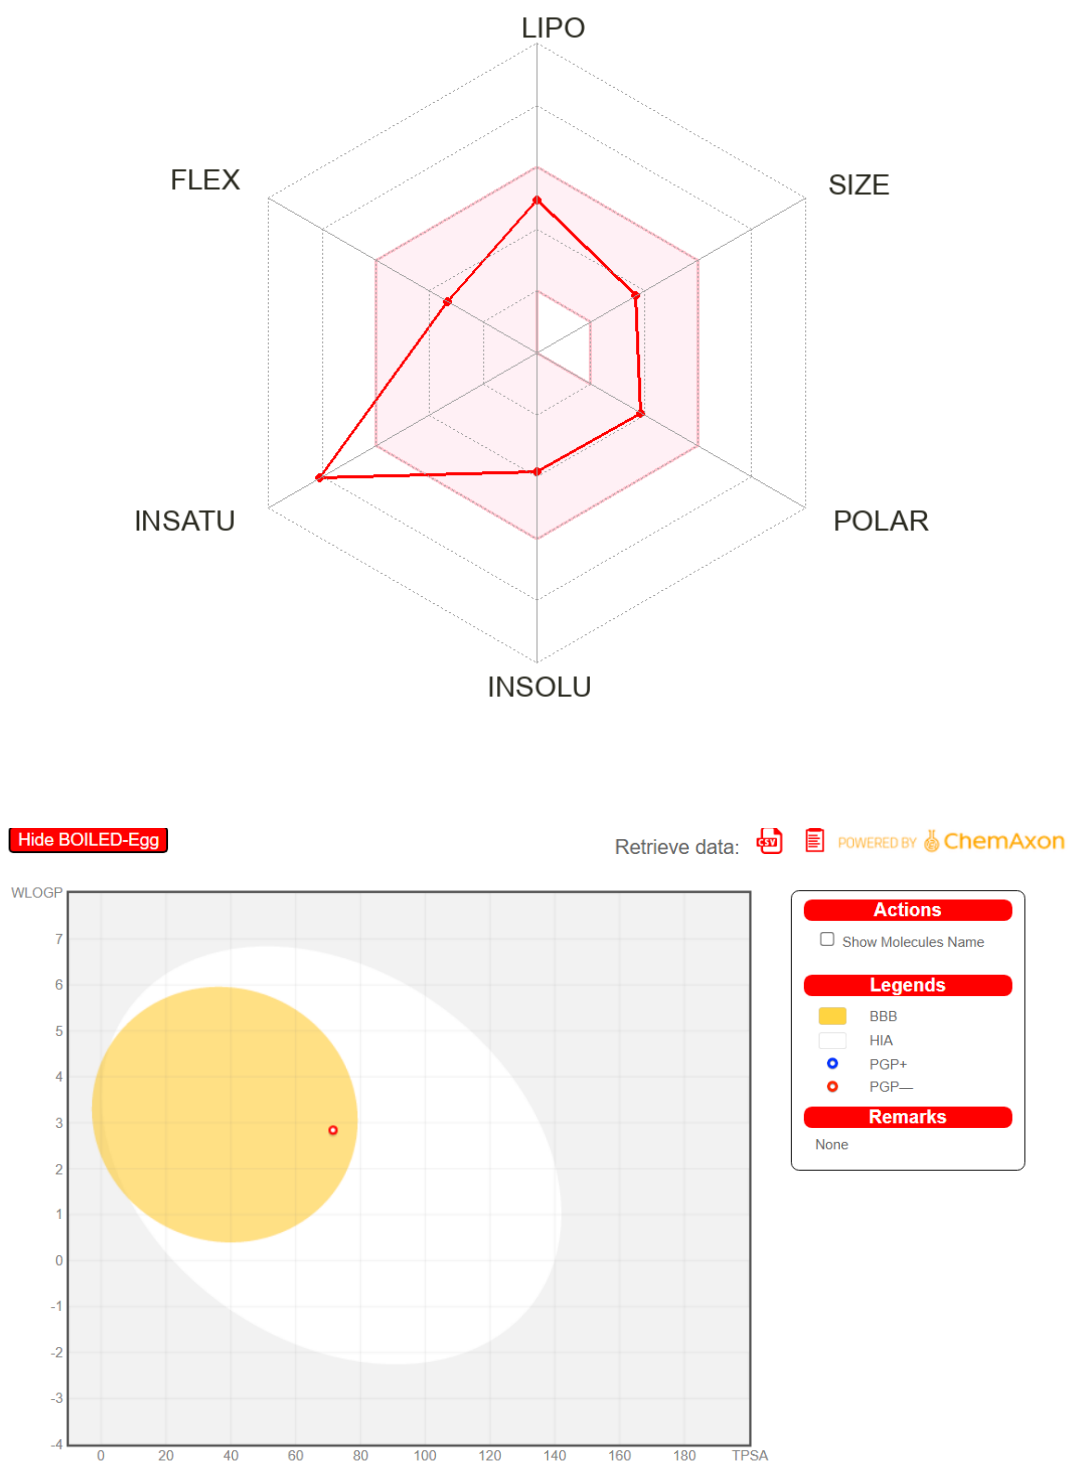

**Figurw S8.** Bioavailability radar and BOILED-Egg model of compound **1h** predicted by SwissADME program

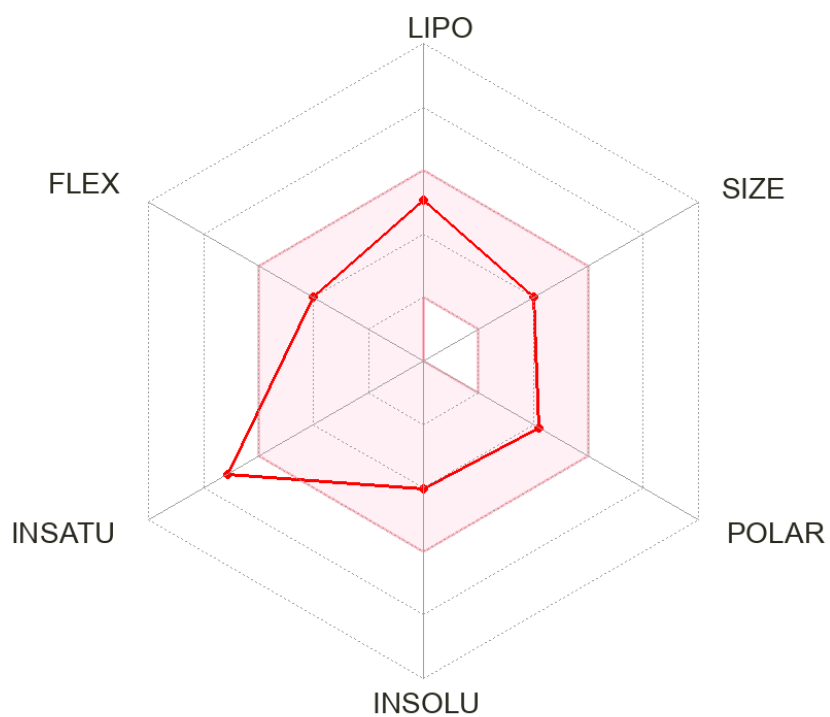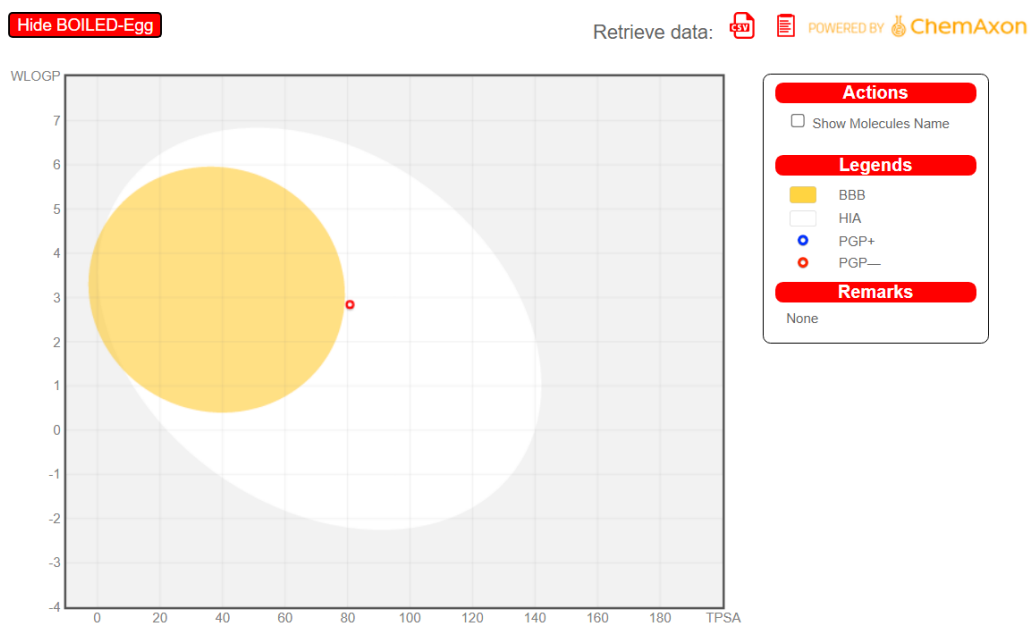

**Figurw S9.** Bioavailability radar and BOILED-Egg model of compound **1i** predicted by SwissADME program

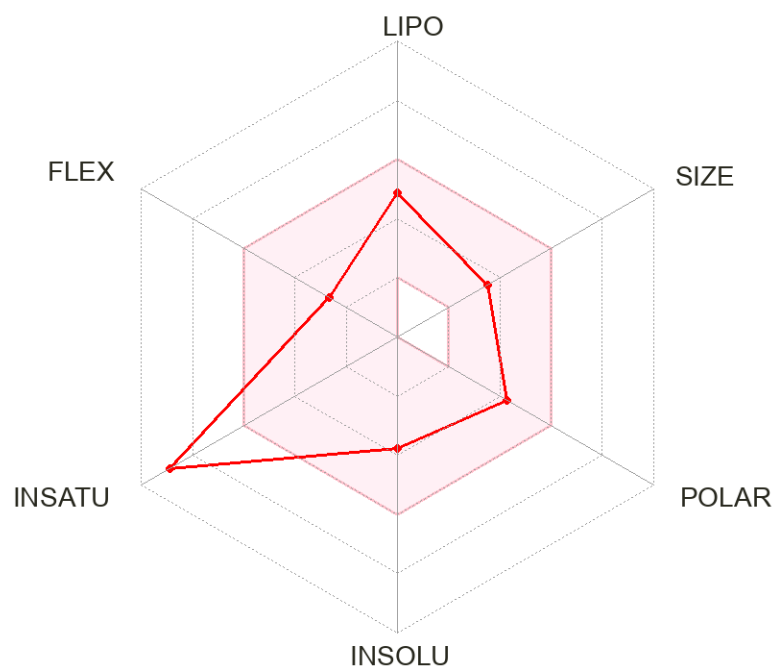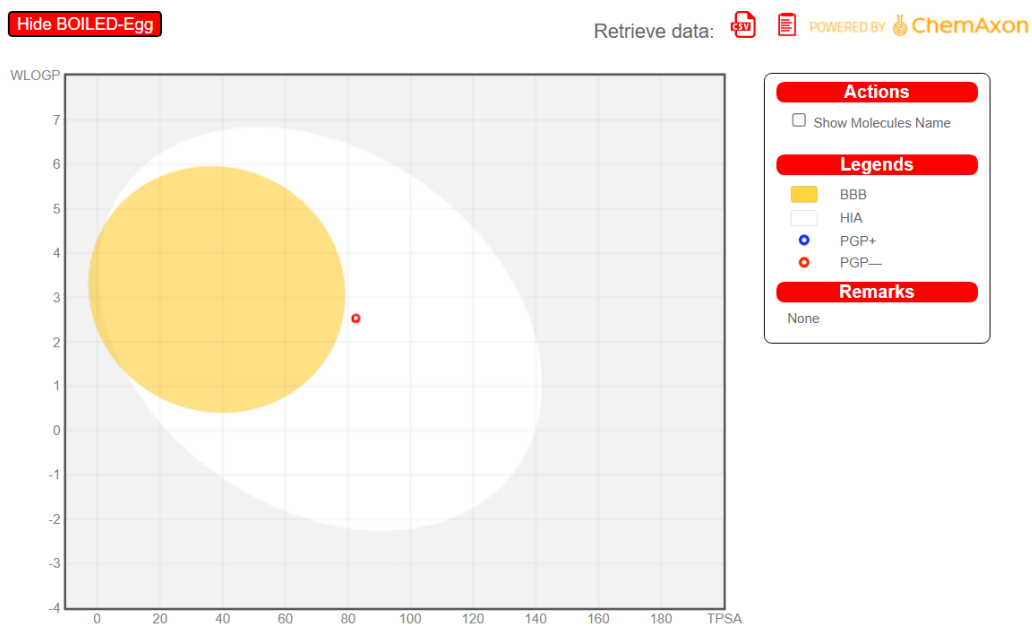

**Figure S10.** Bioavailability radar and BOILED-Egg model of compound **1j** predicted by SwissADME program

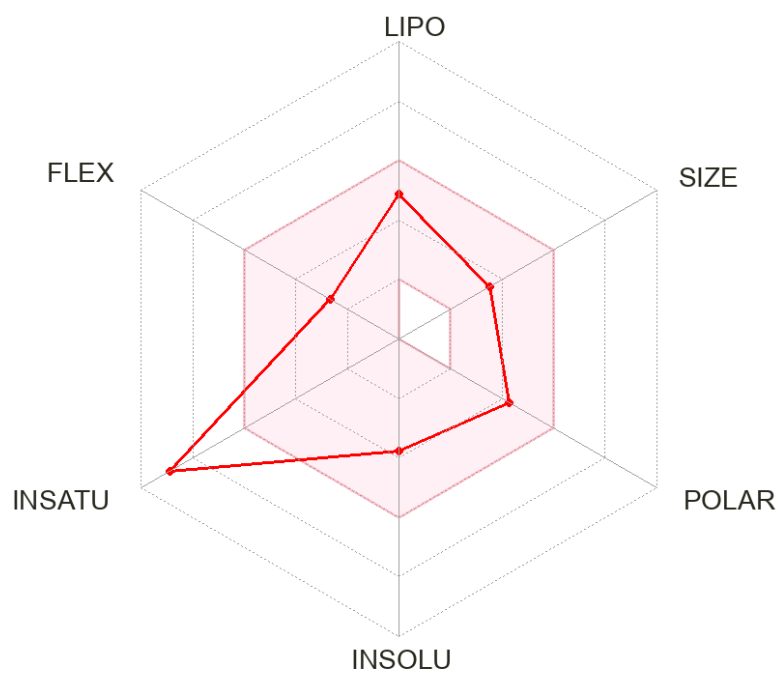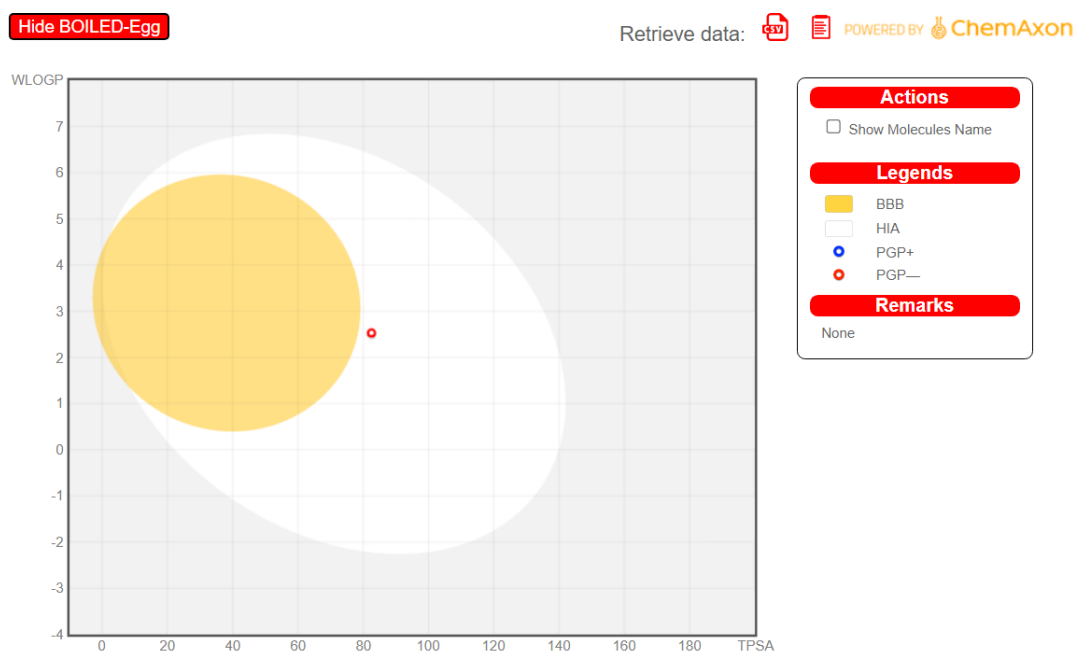

**Figurw S11.** Bioavailability radar and BOILED-Egg model of compound **1k** predicted by SwissADME program

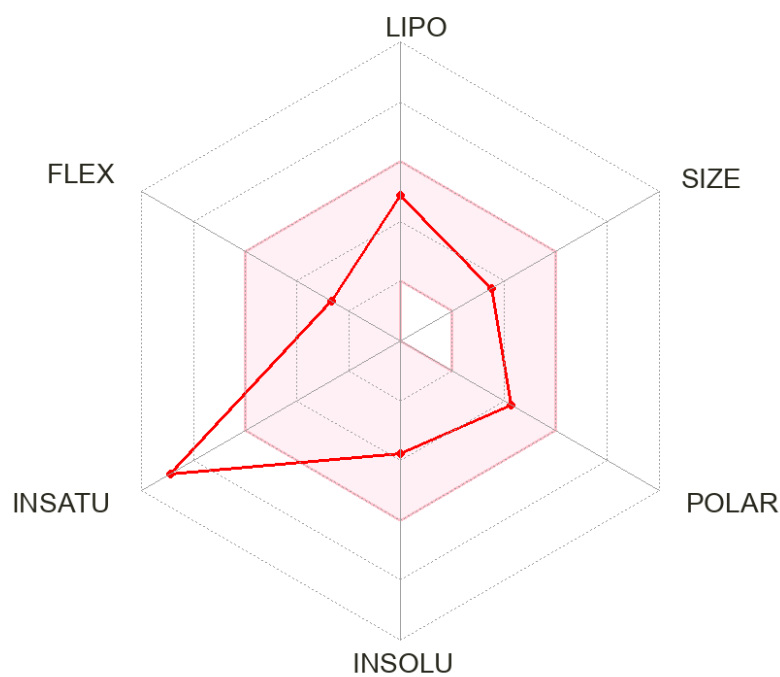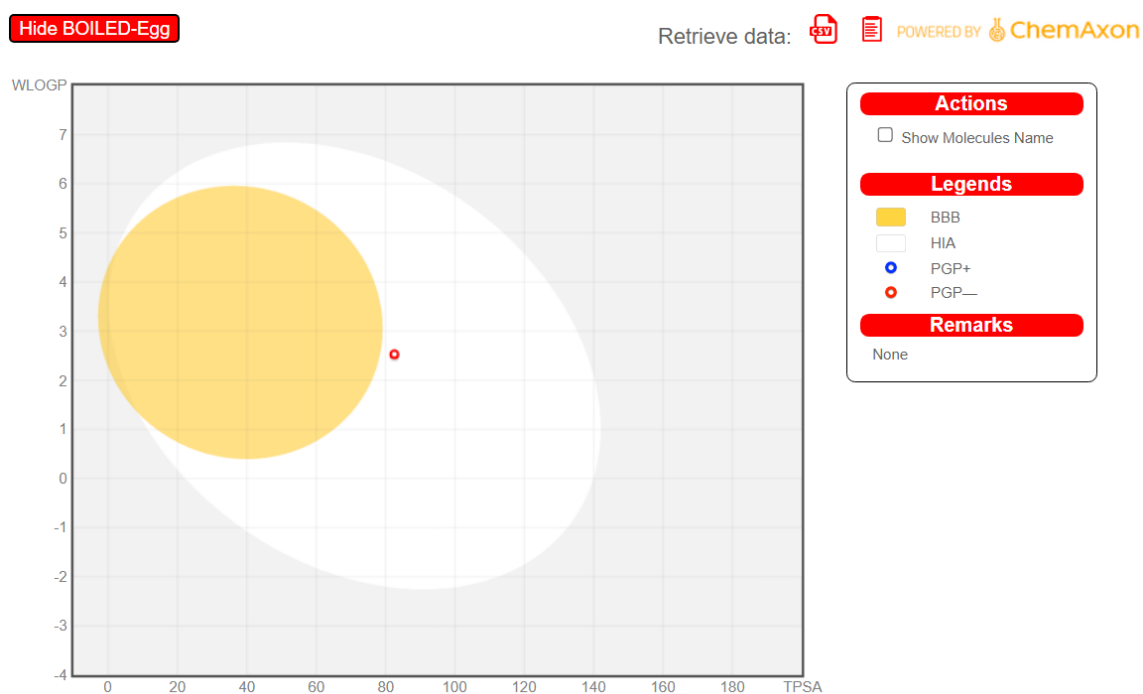

**Figurw S12.** Bioavailability radar and BOILED-Egg model of compound **11** predicted by SwissADME program

**Table S2.** Physico-chemical properties and drug-likeness of compound **1a** predicted by SwissADME program

|                               |                                              |
|-------------------------------|----------------------------------------------|
| Canonical SMILES              | <chem>Oc1ccccc1C=NNc1nc2c([nH]1)cccc2</chem> |
| Formula                       | C14H12N4O                                    |
| MW                            | 252.27                                       |
| #Heavy atoms                  | 19                                           |
| #Aromatic heavy atoms         | 15                                           |
| Fraction Csp3                 | 0                                            |
| #Rotatable bonds              | 3                                            |
| #H-bond acceptors             | 3                                            |
| #H-bond donors                | 3                                            |
| MR                            | 75.59                                        |
| TPSA                          | 73.3                                         |
| iLOGP                         | 0.82                                         |
| XLOGP3                        | 3.08                                         |
| WLOGP                         | 2.52                                         |
| MLOGP                         | 1.92                                         |
| Silicos-IT Log P              | 2.59                                         |
| Consensus Log P               | 2.19                                         |
| ESOL Log S                    | -3.73                                        |
| ESOL Solubility (mg/ml)       | 4.69E-02                                     |
| ESOL Solubility (mol/l)       | 1.86E-04                                     |
| ESOL Class                    | Soluble                                      |
| Ali Log S                     | -4.29                                        |
| Ali Solubility (mg/ml)        | 1.30E-02                                     |
| Ali Solubility (mol/l)        | 5.17E-05                                     |
| Ali Class                     | Moderately soluble                           |
| Silicos-IT LogSw              | -5                                           |
| Silicos-IT Solubility (mg/ml) | 2.51E-03                                     |
| Silicos-IT Solubility (mol/l) | 9.93E-06                                     |
| Silicos-IT class              | Moderately soluble                           |
| GI absorption                 | High                                         |
| BBB permeant                  | Yes                                          |
| Pgp substrate                 | No                                           |
| CYP1A2 inhibitor              | Yes                                          |
| CYP2C19 inhibitor             | No                                           |
| CYP2C9 inhibitor              | No                                           |
| CYP2D6 inhibitor              | No                                           |
| CYP3A4 inhibitor              | No                                           |
| log Kp (cm/s)                 | -5.65                                        |
| Lipinski #violations          | 0                                            |
| Ghose #violations             | 0                                            |

|                          |      |
|--------------------------|------|
| Veber #violations        | 0    |
| Egan #violations         | 0    |
| Muegge #violations       | 0    |
| Bioavailability Score    | 0.55 |
| PAINS #alerts            | 1    |
| Brenk #alerts            | 1    |
| Leadlikeness #violations | 0    |
| Synthetic Accessibility  | 2.52 |

**Table S3.** Physico-chemical properties and drug-likeness of compound **1b** predicted by SwissADME program

|                               |                                                               |
|-------------------------------|---------------------------------------------------------------|
| Canonical SMILES              | <chem>Oc1cccc(c1O)C=NNc1nc2c([nH]1)cccc2</chem>               |
| Formula                       | C <sub>14</sub> H <sub>12</sub> N <sub>4</sub> O <sub>2</sub> |
| MW                            | 268.27                                                        |
| #Heavy atoms                  | 20                                                            |
| #Aromatic heavy atoms         | 15                                                            |
| Fraction Csp <sup>3</sup>     | 0                                                             |
| #Rotatable bonds              | 3                                                             |
| #H-bond acceptors             | 4                                                             |
| #H-bond donors                | 4                                                             |
| MR                            | 77.62                                                         |
| TPSA                          | 93.53                                                         |
| iLOGP                         | 0.32                                                          |
| XLOGP3                        | 2.73                                                          |
| WLOGP                         | 2.23                                                          |
| MLOGP                         | 1.38                                                          |
| Silicos-IT Log P              | 2.1                                                           |
| Consensus Log P               | 1.75                                                          |
| ESOL Log S                    | -3.58                                                         |
| ESOL Solubility (mg/ml)       | 7.05E-02                                                      |
| ESOL Solubility (mol/l)       | 2.63E-04                                                      |
| ESOL Class                    | Soluble                                                       |
| Ali Log S                     | -4.35                                                         |
| Ali Solubility (mg/ml)        | 1.20E-02                                                      |
| Ali Solubility (mol/l)        | 4.48E-05                                                      |
| Ali Class                     | Moderately soluble                                            |
| Silicos-IT LogSw              | -4.42                                                         |
| Silicos-IT Solubility (mg/ml) | 1.01E-02                                                      |
| Silicos-IT Solubility (mol/l) | 3.77E-05                                                      |
| Silicos-IT class              | Moderately soluble                                            |
| GI absorption                 | High                                                          |



|                          |      |
|--------------------------|------|
| BBB permeant             | No   |
| Pgp substrate            | No   |
| CYP1A2 inhibitor         | Yes  |
| CYP2C19 inhibitor        | No   |
| CYP2C9 inhibitor         | No   |
| CYP2D6 inhibitor         | No   |
| CYP3A4 inhibitor         | No   |
| log Kp (cm/s)            | -6   |
| Lipinski #violations     | 0    |
| Ghose #violations        | 0    |
| Veber #violations        | 0    |
| Egan #violations         | 0    |
| Muegge #violations       | 0    |
| Bioavailability Score    | 0.55 |
| PAINS #alerts            | 2    |
| Brenk #alerts            | 2    |
| Leadlikeness #violations | 0    |
| Synthetic Accessibility  | 2.58 |

**Table S4.** Physico-chemical properties and drug-likeness of compound **1c** predicted by SwissADME program

|                         |                                                   |
|-------------------------|---------------------------------------------------|
| Canonical SMILES        | <chem>Oc1ccc(c(c1)O)C=NNc1nc2c([nH]1)cccc2</chem> |
| Formula                 | C14H12N4O2                                        |
| MW                      | 268.27                                            |
| #Heavy atoms            | 20                                                |
| #Aromatic heavy atoms   | 15                                                |
| Fraction Csp3           | 0                                                 |
| #Rotatable bonds        | 3                                                 |
| #H-bond acceptors       | 4                                                 |
| #H-bond donors          | 4                                                 |
| MR                      | 77.62                                             |
| TPSA                    | 93.53                                             |
| iLOGP                   | 0.51                                              |
| XLOGP3                  | 2.73                                              |
| WLOGP                   | 2.23                                              |
| MLOGP                   | 1.38                                              |
| Silicos-IT Log P        | 2.1                                               |
| Consensus Log P         | 1.79                                              |
| ESOL Log S              | -3.58                                             |
| ESOL Solubility (mg/ml) | 7.05E-02                                          |
| ESOL Solubility (mol/l) | 2.63E-04                                          |

|                               |                    |
|-------------------------------|--------------------|
| ESOL Class                    | Soluble            |
| Ali Log S                     | -4.35              |
| Ali Solubility (mg/ml)        | 1.20E-02           |
| Ali Solubility (mol/l)        | 4.48E-05           |
| Ali Class                     | Moderately soluble |
| Silicos-IT LogSw              | -4.42              |
| Silicos-IT Solubility (mg/ml) | 1.01E-02           |
| Silicos-IT Solubility (mol/l) | 3.77E-05           |
| Silicos-IT class              | Moderately soluble |
| GI absorption                 | High               |
| BBB permeant                  | No                 |
| Pgp substrate                 | No                 |
| CYP1A2 inhibitor              | Yes                |
| CYP2C19 inhibitor             | No                 |
| CYP2C9 inhibitor              | No                 |
| CYP2D6 inhibitor              | No                 |
| CYP3A4 inhibitor              | No                 |
| log Kp (cm/s)                 | -6                 |
| Lipinski #violations          | 0                  |
| Ghose #violations             | 0                  |
| Veber #violations             | 0                  |
| Egan #violations              | 0                  |
| Muegge #violations            | 0                  |
| Bioavailability Score         | 0.55               |
| PAINS #alerts                 | 2                  |
| Brenk #alerts                 | 1                  |
| Leadlikeness #violations      | 0                  |
| Synthetic Accessibility       | 2.58               |

**Table S5.** Physico-chemical properties and drug-likeness of compound **1d** predicted by SwissADME program

|                           |                                                               |
|---------------------------|---------------------------------------------------------------|
| Canonical SMILES          | <chem>Oc1ccc(cc1O)C=NNc1nc2c([nH]1)cccc2</chem>               |
| Formula                   | C <sub>14</sub> H <sub>12</sub> N <sub>4</sub> O <sub>2</sub> |
| MW                        | 268.27                                                        |
| #Heavy atoms              | 20                                                            |
| #Aromatic heavy atoms     | 15                                                            |
| Fraction Csp <sup>3</sup> | 0                                                             |
| #Rotatable bonds          | 3                                                             |
| #H-bond acceptors         | 4                                                             |
| #H-bond donors            | 4                                                             |
| MR                        | 77.62                                                         |

|                               |                    |
|-------------------------------|--------------------|
| TPSA                          | 93.53              |
| iLOGP                         | 0.5                |
| XLOGP3                        | 2.73               |
| WLOGP                         | 2.23               |
| MLOGP                         | 1.38               |
| Silicos-IT Log P              | 2.1                |
| Consensus Log P               | 1.79               |
| ESOL Log S                    | -3.58              |
| ESOL Solubility (mg/ml)       | 7.05E-02           |
| ESOL Solubility (mol/l)       | 2.63E-04           |
| ESOL Class                    | Soluble            |
| Ali Log S                     | -4.35              |
| Ali Solubility (mg/ml)        | 1.20E-02           |
| Ali Solubility (mol/l)        | 4.48E-05           |
| Ali Class                     | Moderately soluble |
| Silicos-IT LogSw              | -4.42              |
| Silicos-IT Solubility (mg/ml) | 1.01E-02           |
| Silicos-IT Solubility (mol/l) | 3.77E-05           |
| Silicos-IT class              | Moderately soluble |
| GI absorption                 | High               |
| BBB permeant                  | No                 |
| Pgp substrate                 | No                 |
| CYP1A2 inhibitor              | Yes                |
| CYP2C19 inhibitor             | No                 |
| CYP2C9 inhibitor              | No                 |
| CYP2D6 inhibitor              | No                 |
| CYP3A4 inhibitor              | No                 |
| log Kp (cm/s)                 | -6                 |
| Lipinski #violations          | 0                  |
| Ghose #violations             | 0                  |
| Veber #violations             | 0                  |
| Egan #violations              | 0                  |
| Muegge #violations            | 0                  |
| Bioavailability Score         | 0.55               |
| PAINS #alerts                 | 2                  |
| Brenk #alerts                 | 2                  |
| Leadlikeness #violations      | 0                  |
| Synthetic Accessibility       | 2.48               |

**Table S6.** Physico-chemical properties and drug-likeness of compound **1e** predicted by SwissADME program

|                               |                                                    |
|-------------------------------|----------------------------------------------------|
| Canonical SMILES              | <chem>Oc1ccc(c(c1O)O)C=NNc1nc2c([nH]1)cccc2</chem> |
| Formula                       | C14H12N4O3                                         |
| MW                            | 284.27                                             |
| #Heavy atoms                  | 21                                                 |
| #Aromatic heavy atoms         | 15                                                 |
| Fraction Csp3                 | 0                                                  |
| #Rotatable bonds              | 3                                                  |
| #H-bond acceptors             | 5                                                  |
| #H-bond donors                | 5                                                  |
| MR                            | 79.64                                              |
| TPSA                          | 113.76                                             |
| iLOGP                         | 0.38                                               |
| XLOGP3                        | 2.37                                               |
| WLOGP                         | 1.93                                               |
| MLOGP                         | 0.85                                               |
| Silicos-IT Log P              | 1.62                                               |
| Consensus Log P               | 1.43                                               |
| ESOL Log S                    | -3.43                                              |
| ESOL Solubility (mg/ml)       | 1.07E-01                                           |
| ESOL Solubility (mol/l)       | 3.75E-04                                           |
| ESOL Class                    | Soluble                                            |
| Ali Log S                     | -4.4                                               |
| Ali Solubility (mg/ml)        | 1.13E-02                                           |
| Ali Solubility (mol/l)        | 3.99E-05                                           |
| Ali Class                     | Moderately soluble                                 |
| Silicos-IT LogSw              | -3.84                                              |
| Silicos-IT Solubility (mg/ml) | 4.07E-02                                           |
| Silicos-IT Solubility (mol/l) | 1.43E-04                                           |
| Silicos-IT class              | Soluble                                            |
| GI absorption                 | High                                               |
| BBB permeant                  | No                                                 |
| Pgp substrate                 | No                                                 |
| CYP1A2 inhibitor              | Yes                                                |
| CYP2C19 inhibitor             | No                                                 |
| CYP2C9 inhibitor              | No                                                 |
| CYP2D6 inhibitor              | No                                                 |
| CYP3A4 inhibitor              | No                                                 |
| log Kp (cm/s)                 | -6.35                                              |
| Lipinski #violations          | 0                                                  |
| Ghose #violations             | 0                                                  |
| Veber #violations             | 0                                                  |
| Egan #violations              | 0                                                  |
| Muegge #violations            | 0                                                  |

|                          |      |
|--------------------------|------|
| Bioavailability Score    | 0.55 |
| PAINS #alerts            | 3    |
| Brenk #alerts            | 2    |
| Leadlikeness #violations | 0    |
| Synthetic Accessibility  | 2.64 |

**Table S7.** Physico-chemical properties and drug-likeness of compound **1f** predicted by SwissADME program

|                               |                                                 |
|-------------------------------|-------------------------------------------------|
| Canonical SMILES              | <chem>COc1ccc(cc1)C=NNc1nc2c([nH]1)cccc2</chem> |
| Formula                       | C15H14N4O                                       |
| MW                            | 266.3                                           |
| #Heavy atoms                  | 20                                              |
| #Aromatic heavy atoms         | 15                                              |
| Fraction Csp3                 | 0.07                                            |
| #Rotatable bonds              | 4                                               |
| #H-bond acceptors             | 3                                               |
| #H-bond donors                | 2                                               |
| MR                            | 80.06                                           |
| TPSA                          | 62.3                                            |
| iLOGP                         | 1.47                                            |
| XLOGP3                        | 3.41                                            |
| WLOGP                         | 2.83                                            |
| MLOGP                         | 2.18                                            |
| Silicos-IT Log P              | 3.1                                             |
| Consensus Log P               | 2.6                                             |
| ESOL Log S                    | -3.93                                           |
| ESOL Solubility (mg/ml)       | 3.13E-02                                        |
| ESOL Solubility (mol/l)       | 1.17E-04                                        |
| ESOL Class                    | Soluble                                         |
| Ali Log S                     | -4.4                                            |
| Ali Solubility (mg/ml)        | 1.06E-02                                        |
| Ali Solubility (mol/l)        | 4.00E-05                                        |
| Ali Class                     | Moderately soluble                              |
| Silicos-IT LogSw              | -5.7                                            |
| Silicos-IT Solubility (mg/ml) | 5.29E-04                                        |
| Silicos-IT Solubility (mol/l) | 1.99E-06                                        |
| Silicos-IT class              | Moderately soluble                              |
| GI absorption                 | High                                            |
| BBB permeant                  | Yes                                             |
| Pgp substrate                 | No                                              |
| CYP1A2 inhibitor              | Yes                                             |

|                          |      |
|--------------------------|------|
| CYP2C19 inhibitor        | Yes  |
| CYP2C9 inhibitor         | No   |
| CYP2D6 inhibitor         | Yes  |
| CYP3A4 inhibitor         | No   |
| log Kp (cm/s)            | -5.5 |
| Lipinski #violations     | 0    |
| Ghose #violations        | 0    |
| Veber #violations        | 0    |
| Egan #violations         | 0    |
| Muegge #violations       | 0    |
| Bioavailability Score    | 0.55 |
| PAINS #alerts            | 0    |
| Brenk #alerts            | 1    |
| Leadlikeness #violations | 0    |
| Synthetic Accessibility  | 2.47 |

**Table S8.** Physico-chemical properties and drug-likeness of compound **1g** predicted by SwissADME program

|                         |                                                   |
|-------------------------|---------------------------------------------------|
| Canonical SMILES        | <chem>COc1cccc(c1C=NNc1nc2c([nH]1)cccc2)OC</chem> |
| Formula                 | C16H16N4O2                                        |
| MW                      | 296.32                                            |
| #Heavy atoms            | 22                                                |
| #Aromatic heavy atoms   | 15                                                |
| Fraction Csp3           | 0.12                                              |
| #Rotatable bonds        | 5                                                 |
| #H-bond acceptors       | 4                                                 |
| #H-bond donors          | 2                                                 |
| MR                      | 86.56                                             |
| TPSA                    | 71.53                                             |
| iLOGP                   | 1.59                                              |
| XLOGP3                  | 3.38                                              |
| WLOGP                   | 2.84                                              |
| MLOGP                   | 1.88                                              |
| Silicos-IT Log P        | 3.14                                              |
| Consensus Log P         | 2.57                                              |
| ESOL Log S              | -3.98                                             |
| ESOL Solubility (mg/ml) | 3.09E-02                                          |
| ESOL Solubility (mol/l) | 1.04E-04                                          |
| ESOL Class              | Soluble                                           |
| Ali Log S               | -4.56                                             |
| Ali Solubility (mg/ml)  | 8.15E-03                                          |

|                               |                    |
|-------------------------------|--------------------|
| Ali Solubility (mol/l)        | 2.75E-05           |
| Ali Class                     | Moderately soluble |
| Silicos-IT LogSw              | -5.82              |
| Silicos-IT Solubility (mg/ml) | 4.50E-04           |
| Silicos-IT Solubility (mol/l) | 1.52E-06           |
| Silicos-IT class              | Moderately soluble |
| GI absorption                 | High               |
| BBB permeant                  | Yes                |
| Pgp substrate                 | No                 |
| CYP1A2 inhibitor              | Yes                |
| CYP2C19 inhibitor             | Yes                |
| CYP2C9 inhibitor              | No                 |
| CYP2D6 inhibitor              | Yes                |
| CYP3A4 inhibitor              | No                 |
| log Kp (cm/s)                 | -5.71              |
| Lipinski #violations          | 0                  |
| Ghose #violations             | 0                  |
| Veber #violations             | 0                  |
| Egan #violations              | 0                  |
| Muegge #violations            | 0                  |
| Bioavailability Score         | 0.55               |
| PAINS #alerts                 | 0                  |
| Brenk #alerts                 | 1                  |
| Leadlikeness #violations      | 0                  |
| Synthetic Accessibility       | 2.79               |

**Table S9.** Physico-chemical properties and drug-likeness of compound **1h** predicted by SwissADME program

|                           |                                                               |
|---------------------------|---------------------------------------------------------------|
| Canonical SMILES          | <chem>COc1cc(C=NNc2nc3c([nH]2)cccc3)cc(c1)OC</chem>           |
| Formula                   | C <sub>16</sub> H <sub>16</sub> N <sub>4</sub> O <sub>2</sub> |
| MW                        | 296.32                                                        |
| #Heavy atoms              | 22                                                            |
| #Aromatic heavy atoms     | 15                                                            |
| Fraction Csp <sup>3</sup> | 0.12                                                          |
| #Rotatable bonds          | 5                                                             |
| #H-bond acceptors         | 4                                                             |
| #H-bond donors            | 2                                                             |
| MR                        | 86.56                                                         |
| TPSA                      | 71.53                                                         |
| iLOGP                     | 1.9                                                           |
| XLOGP3                    | 3.15                                                          |

|                               |                    |
|-------------------------------|--------------------|
| WLOGP                         | 2.84               |
| MLOGP                         | 1.88               |
| Silicos-IT Log P              | 3.14               |
| Consensus Log P               | 2.58               |
| ESOL Log S                    | -3.84              |
| ESOL Solubility (mg/ml)       | 4.32E-02           |
| ESOL Solubility (mol/l)       | 1.46E-04           |
| ESOL Class                    | Soluble            |
| Ali Log S                     | -4.32              |
| Ali Solubility (mg/ml)        | 1.41E-02           |
| Ali Solubility (mol/l)        | 4.76E-05           |
| Ali Class                     | Moderately soluble |
| Silicos-IT LogSw              | -5.82              |
| Silicos-IT Solubility (mg/ml) | 4.50E-04           |
| Silicos-IT Solubility (mol/l) | 1.52E-06           |
| Silicos-IT class              | Moderately soluble |
| GI absorption                 | High               |
| BBB permeant                  | Yes                |
| Pgp substrate                 | No                 |
| CYP1A2 inhibitor              | Yes                |
| CYP2C19 inhibitor             | Yes                |
| CYP2C9 inhibitor              | No                 |
| CYP2D6 inhibitor              | Yes                |
| CYP3A4 inhibitor              | No                 |
| log Kp (cm/s)                 | -5.87              |
| Lipinski #violations          | 0                  |
| Ghose #violations             | 0                  |
| Veber #violations             | 0                  |
| Egan #violations              | 0                  |
| Muegge #violations            | 0                  |
| Bioavailability Score         | 0.55               |
| PAINS #alerts                 | 0                  |
| Brenk #alerts                 | 1                  |
| Leadlikeness #violations      | 0                  |
| Synthetic Accessibility       | 2.67               |

**Table S10.** Physico-chemical properties and drug-likeness of compound **1i** predicted by SwissADME program

|                  |                                                       |
|------------------|-------------------------------------------------------|
| Canonical SMILES | <chem>COc1cc(C=NNc2nc3c([nH]2)cccc3)cc(c1OC)OC</chem> |
| Formula          | C17H18N4O3                                            |
| MW               | 326.35                                                |



|                               |                    |
|-------------------------------|--------------------|
| #Heavy atoms                  | 24                 |
| #Aromatic heavy atoms         | 15                 |
| Fraction Csp3                 | 0.18               |
| #Rotatable bonds              | 6                  |
| #H-bond acceptors             | 5                  |
| #H-bond donors                | 2                  |
| MR                            | 93.05              |
| TPSA                          | 80.76              |
| iLOGP                         | 1.87               |
| XLOGP3                        | 3.35               |
| WLOGP                         | 2.84               |
| MLOGP                         | 1.6                |
| Silicos-IT Log P              | 3.19               |
| Consensus Log P               | 2.57               |
| ESOL Log S                    | -4.04              |
| ESOL Solubility (mg/ml)       | 2.97E-02           |
| ESOL Solubility (mol/l)       | 9.11E-05           |
| ESOL Class                    | Moderately soluble |
| Ali Log S                     | -4.72              |
| Ali Solubility (mg/ml)        | 6.17E-03           |
| Ali Solubility (mol/l)        | 1.89E-05           |
| Ali Class                     | Moderately soluble |
| Silicos-IT LogSw              | -5.93              |
| Silicos-IT Solubility (mg/ml) | 3.82E-04           |
| Silicos-IT Solubility (mol/l) | 1.17E-06           |
| Silicos-IT class              | Moderately soluble |
| GI absorption                 | High               |
| BBB permeant                  | No                 |
| Pgp substrate                 | No                 |
| CYP1A2 inhibitor              | Yes                |
| CYP2C19 inhibitor             | No                 |
| CYP2C9 inhibitor              | Yes                |
| CYP2D6 inhibitor              | Yes                |
| CYP3A4 inhibitor              | No                 |
| log Kp (cm/s)                 | -5.91              |
| Lipinski #violations          | 0                  |
| Ghose #violations             | 0                  |
| Veber #violations             | 0                  |
| Egan #violations              | 0                  |
| Muegge #violations            | 0                  |
| Bioavailability Score         | 0.55               |
| PAINS #alerts                 | 0                  |
| Brenk #alerts                 | 1                  |

|                          |      |
|--------------------------|------|
| Leadlikeness #violations | 0    |
| Synthetic Accessibility  | 2.86 |

**Table S11.** Physico-chemical properties and drug-likeness of compound **1j** predicted by SwissADME program

|                               |                                                  |
|-------------------------------|--------------------------------------------------|
| Canonical SMILES              | <chem>COc1cccc(c1O)C=NNc1nc2c([nH]1)cccc2</chem> |
| Formula                       | C15H14N4O2                                       |
| MW                            | 282.3                                            |
| #Heavy atoms                  | 21                                               |
| #Aromatic heavy atoms         | 15                                               |
| Fraction Csp3                 | 0.07                                             |
| #Rotatable bonds              | 4                                                |
| #H-bond acceptors             | 4                                                |
| #H-bond donors                | 3                                                |
| MR                            | 82.09                                            |
| TPSA                          | 82.53                                            |
| iLOGP                         | 1.39                                             |
| XLOGP3                        | 3.05                                             |
| WLOGP                         | 2.53                                             |
| MLOGP                         | 1.63                                             |
| Silicos-IT Log P              | 2.62                                             |
| Consensus Log P               | 2.25                                             |
| ESOL Log S                    | -3.78                                            |
| ESOL Solubility (mg/ml)       | 4.72E-02                                         |
| ESOL Solubility (mol/l)       | 1.67E-04                                         |
| ESOL Class                    | Soluble                                          |
| Ali Log S                     | -4.45                                            |
| Ali Solubility (mg/ml)        | 1.00E-02                                         |
| Ali Solubility (mol/l)        | 3.55E-05                                         |
| Ali Class                     | Moderately soluble                               |
| Silicos-IT LogSw              | -5.12                                            |
| Silicos-IT Solubility (mg/ml) | 2.13E-03                                         |
| Silicos-IT Solubility (mol/l) | 7.55E-06                                         |
| Silicos-IT class              | Moderately soluble                               |
| GI absorption                 | High                                             |
| BBB permeant                  | No                                               |
| Pgp substrate                 | No                                               |
| CYP1A2 inhibitor              | Yes                                              |
| CYP2C19 inhibitor             | No                                               |
| CYP2C9 inhibitor              | No                                               |
| CYP2D6 inhibitor              | Yes                                              |

|                          |       |
|--------------------------|-------|
| CYP3A4 inhibitor         | No    |
| log Kp (cm/s)            | -5.86 |
| Lipinski #violations     | 0     |
| Ghose #violations        | 0     |
| Veber #violations        | 0     |
| Egan #violations         | 0     |
| Muegge #violations       | 0     |
| Bioavailability Score    | 0.55  |
| PAINS #alerts            | 1     |
| Brenk #alerts            | 1     |
| Leadlikeness #violations | 0     |
| Synthetic Accessibility  | 2.65  |

**Table S12.** Physico-chemical properties and drug-likeness of compound **1k** predicted by SwissADME program

|                         |                                                    |
|-------------------------|----------------------------------------------------|
| Canonical SMILES        | <chem>COc1ccc(c(c1)O)C=NNc1nc2c([nH]1)cccc2</chem> |
| Formula                 | C15H14N4O2                                         |
| MW                      | 282.3                                              |
| #Heavy atoms            | 21                                                 |
| #Aromatic heavy atoms   | 15                                                 |
| Fraction Csp3           | 0.07                                               |
| #Rotatable bonds        | 4                                                  |
| #H-bond acceptors       | 4                                                  |
| #H-bond donors          | 3                                                  |
| MR                      | 82.09                                              |
| TPSA                    | 82.53                                              |
| iLOGP                   | 1.28                                               |
| XLOGP3                  | 3.05                                               |
| WLOGP                   | 2.53                                               |
| MLOGP                   | 1.63                                               |
| Silicos-IT Log P        | 2.62                                               |
| Consensus Log P         | 2.22                                               |
| ESOL Log S              | -3.78                                              |
| ESOL Solubility (mg/ml) | 4.72E-02                                           |
| ESOL Solubility (mol/l) | 1.67E-04                                           |
| ESOL Class              | Soluble                                            |
| Ali Log S               | -4.45                                              |
| Ali Solubility (mg/ml)  | 1.00E-02                                           |
| Ali Solubility (mol/l)  | 3.55E-05                                           |
| Ali Class               | Moderately soluble                                 |
| Silicos-IT LogSw        | -5.12                                              |

|                               |                    |
|-------------------------------|--------------------|
| Silicos-IT Solubility (mg/ml) | 2.13E-03           |
| Silicos-IT Solubility (mol/l) | 7.55E-06           |
| Silicos-IT class              | Moderately soluble |
| GI absorption                 | High               |
| BBB permeant                  | No                 |
| Pgp substrate                 | No                 |
| CYP1A2 inhibitor              | Yes                |
| CYP2C19 inhibitor             | No                 |
| CYP2C9 inhibitor              | No                 |
| CYP2D6 inhibitor              | No                 |
| CYP3A4 inhibitor              | No                 |
| log Kp (cm/s)                 | -5.86              |
| Lipinski #violations          | 0                  |
| Ghose #violations             | 0                  |
| Veber #violations             | 0                  |
| Egan #violations              | 0                  |
| Muegge #violations            | 0                  |
| Bioavailability Score         | 0.55               |
| PAINS #alerts                 | 1                  |
| Brenk #alerts                 | 1                  |
| Leadlikeness #violations      | 0                  |
| Synthetic Accessibility       | 2.66               |

**Table S13.** Physico-chemical properties and drug-likeness of compound **11** predicted by SwissADME program

|                       |                                                  |
|-----------------------|--------------------------------------------------|
| Canonical SMILES      | <chem>COc1ccc(cc1O)C=NNc1nc2c([nH]1)cccc2</chem> |
| Formula               | C15H14N4O2                                       |
| MW                    | 282.3                                            |
| #Heavy atoms          | 21                                               |
| #Aromatic heavy atoms | 15                                               |
| Fraction Csp3         | 0.07                                             |
| #Rotatable bonds      | 4                                                |
| #H-bond acceptors     | 4                                                |
| #H-bond donors        | 3                                                |
| MR                    | 82.09                                            |
| TPSA                  | 82.53                                            |
| iLOGP                 | 2.18                                             |
| XLOGP3                | 3.05                                             |
| WLOGP                 | 2.53                                             |
| MLOGP                 | 1.63                                             |
| Silicos-IT Log P      | 2.62                                             |

|                               |                    |
|-------------------------------|--------------------|
| Consensus Log P               | 2.4                |
| ESOL Log S                    | -3.78              |
| ESOL Solubility (mg/ml)       | 4.72E-02           |
| ESOL Solubility (mol/l)       | 1.67E-04           |
| ESOL Class                    | Soluble            |
| Ali Log S                     | -4.45              |
| Ali Solubility (mg/ml)        | 1.00E-02           |
| Ali Solubility (mol/l)        | 3.55E-05           |
| Ali Class                     | Moderately soluble |
| Silicos-IT LogSw              | -5.12              |
| Silicos-IT Solubility (mg/ml) | 2.13E-03           |
| Silicos-IT Solubility (mol/l) | 7.55E-06           |
| Silicos-IT class              | Moderately soluble |
| GI absorption                 | High               |
| BBB permeant                  | No                 |
| Pgp substrate                 | No                 |
| CYP1A2 inhibitor              | Yes                |
| CYP2C19 inhibitor             | No                 |
| CYP2C9 inhibitor              | No                 |
| CYP2D6 inhibitor              | Yes                |
| CYP3A4 inhibitor              | No                 |
| log Kp (cm/s)                 | -5.86              |
| Lipinski #violations          | 0                  |
| Ghose #violations             | 0                  |
| Veber #violations             | 0                  |
| Egan #violations              | 0                  |
| Muegge #violations            | 0                  |
| Bioavailability Score         | 0.55               |
| PAINS #alerts                 | 0                  |
| Brenk #alerts                 | 1                  |
| Leadlikeness #violations      | 0                  |
| Synthetic Accessibility       | 2.55               |
